# Supplementary material for: Recurrent DCC gene losses during bird evolution
Source: PubMed Central journal article supplement (PMC5327424; doi:10.1038/srep37569), 2017-02-27
Supplement: srep37569-s4.pdf [file srep37569-s4.pdf]

## Supplementary materials for

### Recurrent *DCC* gene losses during bird evolution

François Friocourt<sup>1</sup>, Anne-Gaelle Lafont<sup>2</sup>, Clémence Kress<sup>3</sup>, Bertrand Pain<sup>3</sup> Marie  
Manceau<sup>4</sup>, Sylvie Dufour<sup>2</sup> and Alain Chédotal<sup>1, \*</sup>

<sup>1</sup> Sorbonne Universités, UPMC Univ Paris 06, INSERM, CNRS, Institut de la Vision,  
17 Rue Moreau, 75012 Paris, France

<sup>2</sup> Muséum National d'Histoire Naturelle, Sorbonne Universités, Research Unit  
BOREA, Biology of Aquatic Organisms and Ecosystems, CNRS 7208, IRD207,  
UPMC, UCN, Paris, France

<sup>3</sup> Université Lyon 1, INSERM, INRA, Stem Cell and Brain Research Institute, U1208,  
USC1361, 69500 Bron, France

<sup>4</sup> Center for Interdisciplinary Research in Biology, CNRS UMR 7241, Collège de  
France, 75005 Paris, France

\* corresponding author

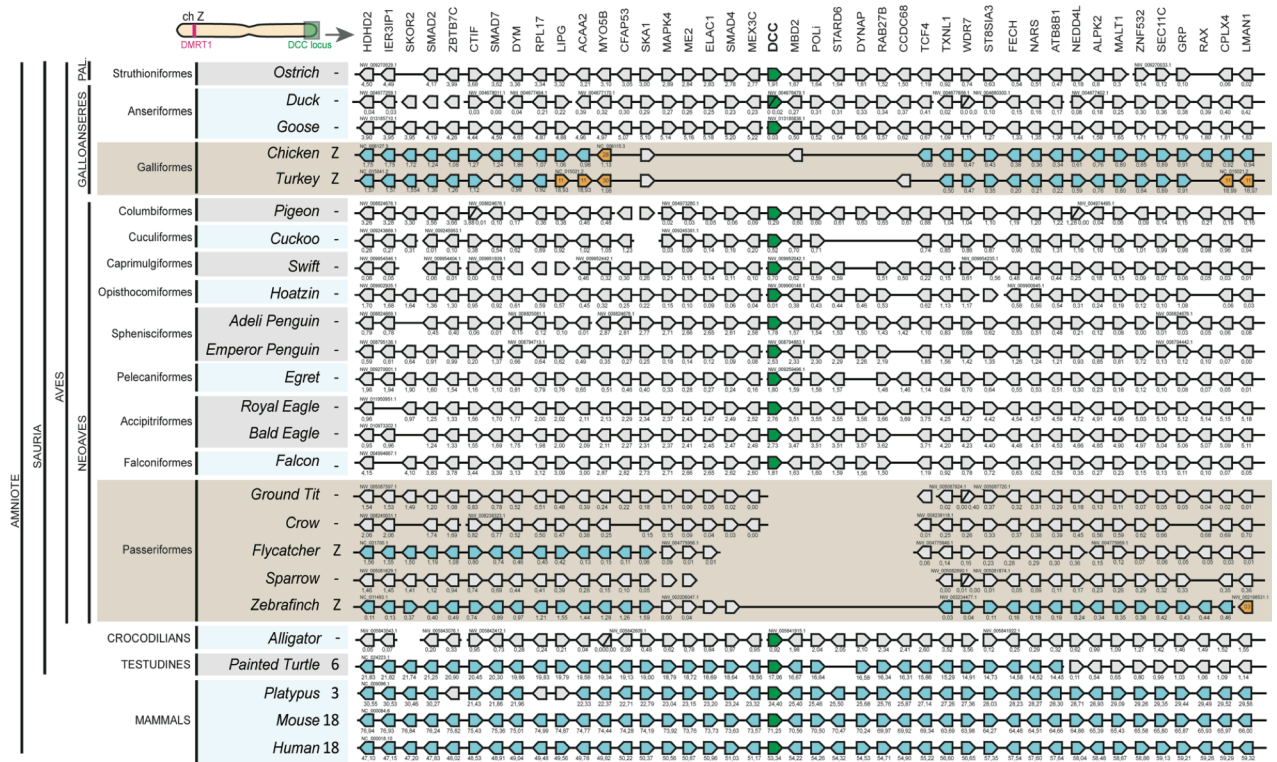

**Figure S1 – Synteny analysis of *DCC* chromosomal region in amniotes.**

Genomic synteny map comparing positions of *DCC* and its neighbouring genes in different amniote species, including a wide variety of birds. Orthologues of each gene are displayed in the same column. Genes from unplaced genomic scaffolds are represented in grey. Genes that have been positioned on chromosomes on annotated genomes are represented in blue if they are on the same chromosome as *DCC* or on bird dimorphic sexual Z chromosome, and in orange if they are located on another chromosome. Chromosome or scaffold references are indicated above each independent sequence.

The genes shown in this figure are not necessary presented in the same order as their actual locations on the chromosomes and scaffolds, which are indicated in  $10^6$  base pairs. A broken line symbolizes the location of a gene on different scaffolds or contigs. The detailed genomic locations of all the genes are given in Supplementary Table S3. Detailed gene names and species names are given in Supplementary Table S4 and S5 respectively.

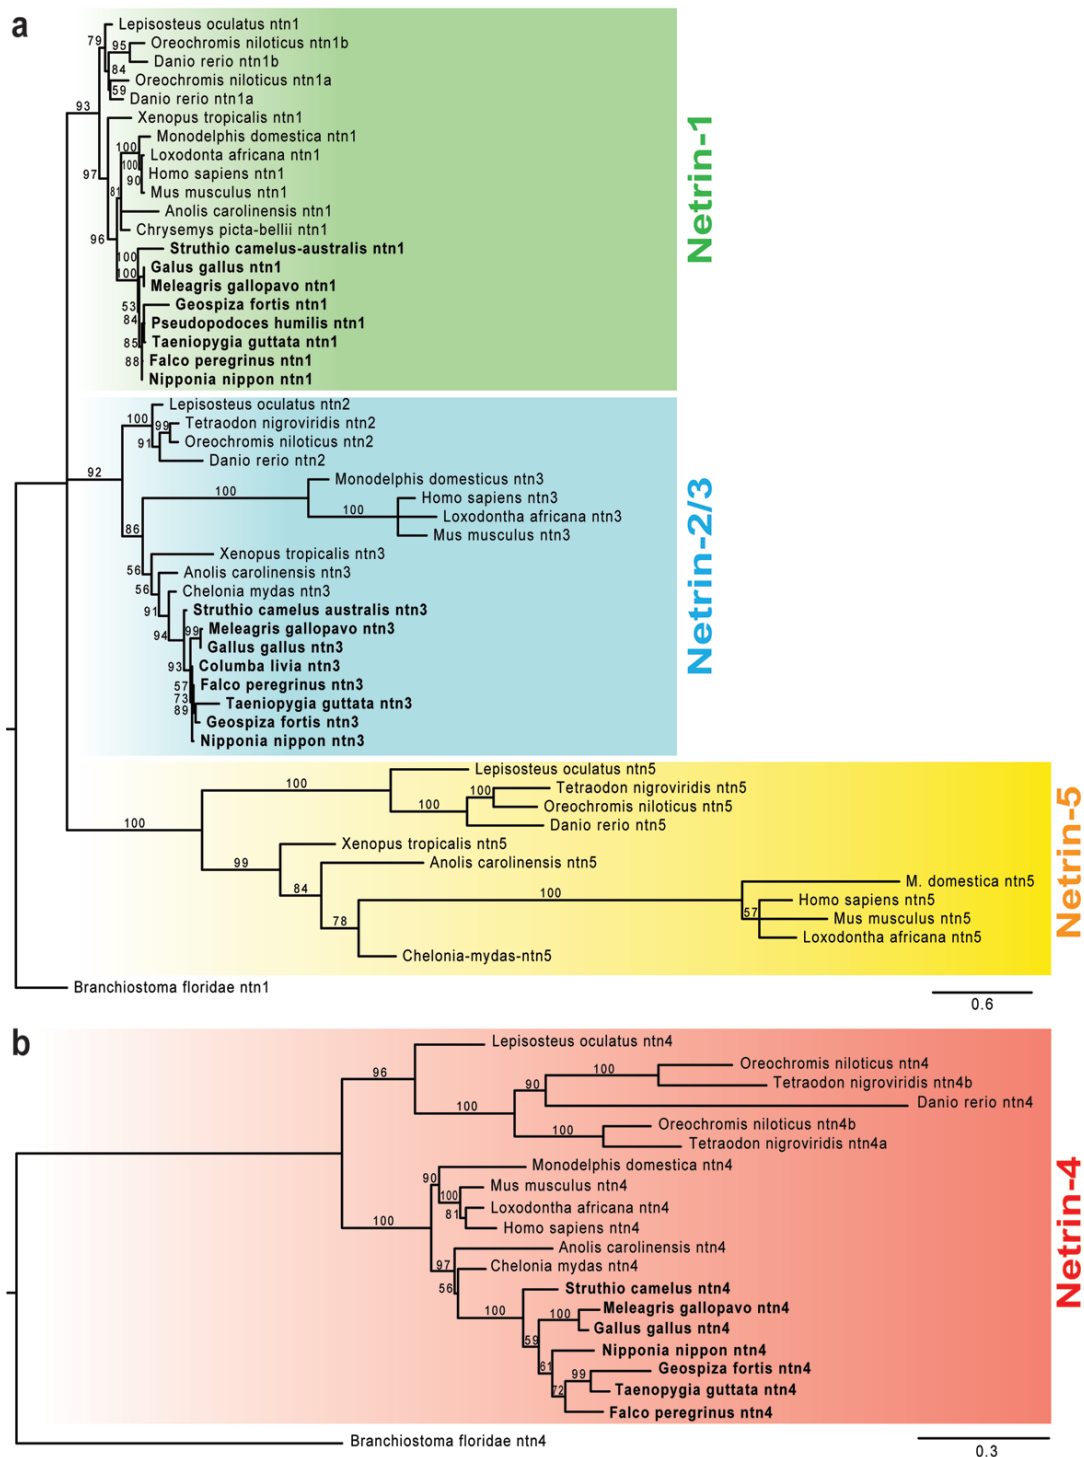

**Figure S2 – Consensus phylogenetic tree of vertebrate NETRIN-1/2/3/5 and NETRIN-4.** Phylogenetic analysis of 52 vertebrate NETRIN-1, NETRIN-2/3 and NETRIN-5 amino acid sequences (**a**) and 19 vertebrate NETRIN-4 amino acid sequences (**b**) were performed using the Maximum likelihood method, with 1000 bootstrap replicates (for the references of sequences, see Supplementary Table S1). The number displayed at each branch node indicates bootstrap value in percentage. Only values above 50% are indicated. The tree was rooted using *Branchiostoma floridae* NETRIN-1 and NETRIN-4 sequences as outgroups, respectively. Vertebrate NETRIN-1 group is indicated in red, NETRIN-2/3 in green, NETRIN-5 in yellow and NETRIN-4 in red. Bird protein sequences are presented in bold.

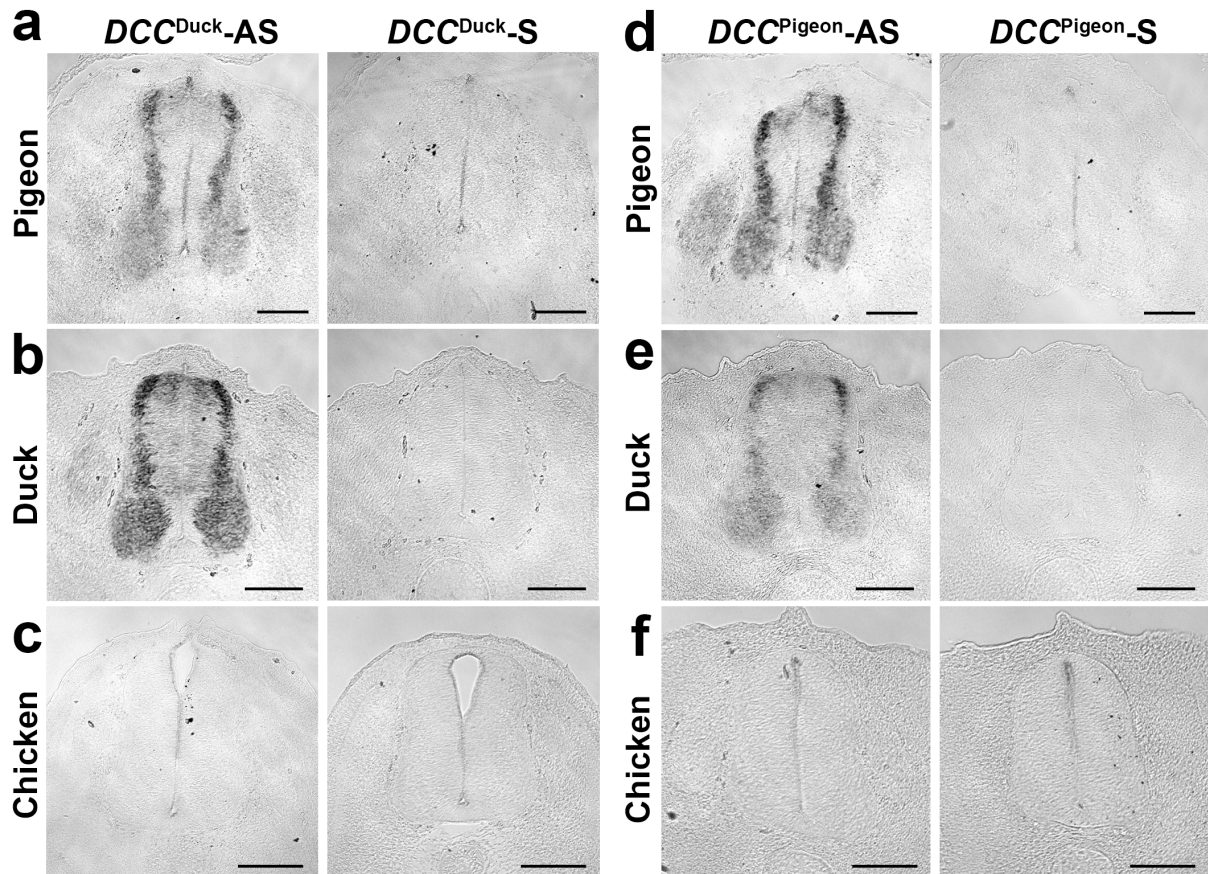

**Figure S3. *In situ* hybridization for *DCC* in pigeon, duck and chicken spinal cord. a-c.** *In situ* hybridization using *DCC* antisense (AS) riboprobe amplified from duck cDNAs shows labeling in spinal cord interneurons and motor neurons territory from pigeon (a), duck (b), but not chicken (c) embryos. No labeling is seen with sense (S) riboprobes. **d-f.** *In situ* hybridization using *DCC* antisense (AS) riboprobe from pigeon cDNA shows labeling in spinal cord from pigeon (d), duck (e), but not chicken (f) embryos. No staining is seen with sense (S) riboprobes. Scale bars: 50 $\mu$ m.

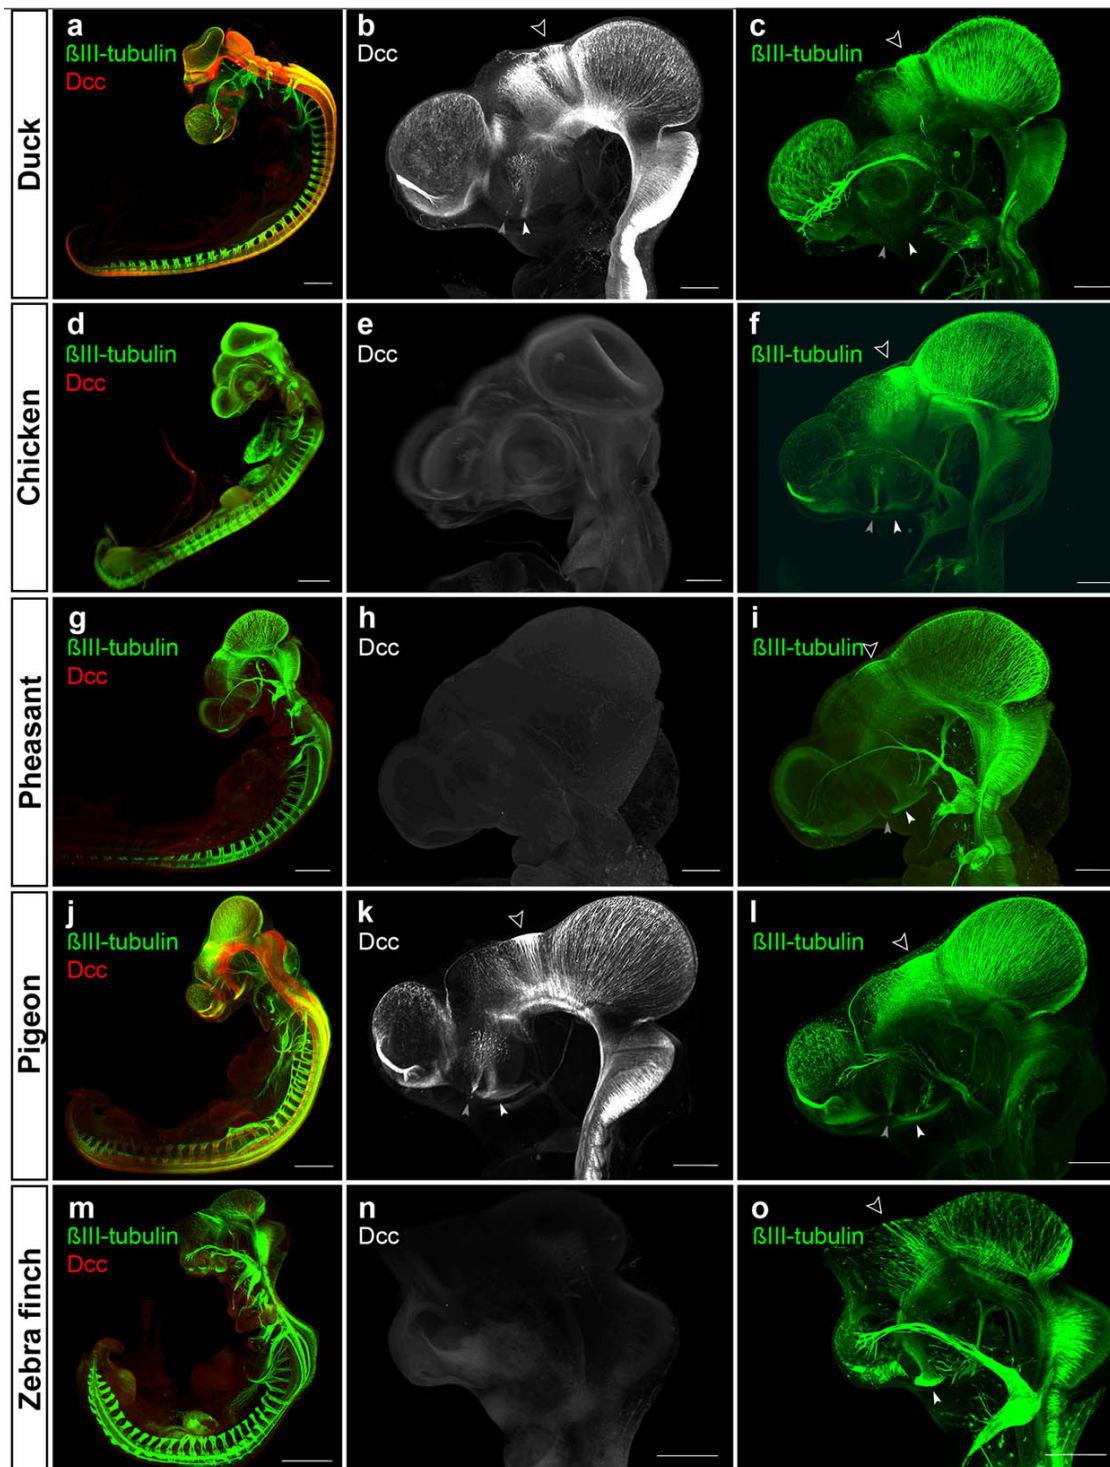

**Figure S4. DCC expression in duck, chicken, pheasant, pigeon and zebra finch.** Light sheet images of HH21-23 duck (**a-f-k**), chicken (**b-g-l**), pheasant (**c-h-m**), pigeon (**d-i-n**) and zebra finch (**e-j-o**) embryos after DCC and  $\beta$ III-tubulin whole-mount immunostaining and 3DISCO clearing. Open arrows indicate the posterior commissure, white arrowheads the post-optic commissure and grey arrowheads the optic nerve. Scale bars: 500 $\mu$ m (left); 200 $\mu$ m (right).

**Table S1 – Names and references of DCC/NEOGENIN proteins identified and used in this study.**

|                     | Name                                 | Latin name                             | Gene ID                |                        |
|---------------------|--------------------------------------|----------------------------------------|------------------------|------------------------|
|                     |                                      |                                        | DCC                    | Neogenin               |
|                     | Spotted Gar                          | <i>Lepisosteus oculatus</i>            | ENSLOCP00000003949     | XP_006629128.1         |
|                     | Zebrafish                            | <i>Danio rerio</i>                     | NP_001030157.1         | AAL92552.1             |
|                     | Tilapia                              | <i>Oreochromis niloticus</i>           | XP_005470639.1         | XP_005455737.1         |
|                     | Medaka                               | <i>Oryzias latipes</i>                 | XP_011480439.1         | XP_011485992.1         |
|                     | Tetraodon                            | <i>Tetraodon nigroviridis</i>          | ENSTNIP00000017207     | ENSTNIT00000012640     |
|                     | Xenopus                              | <i>Xenopus tropicalis</i>              | XP_004910423.1         | ABA02169.1             |
|                     | Opossum                              | <i>Monodelphis domestica</i>           | ENSMODP00000013810     | XP_007478277.1         |
|                     | Elephant                             | <i>Loxodonta africana</i>              | XP_003406765.1         | XP_010592181.1         |
|                     | Mouse                                | <i>Mus musculus</i>                    | ENSMUSP000000110593    | AAH54540.1             |
|                     | Human                                | <i>Homo sapiens</i>                    | ENSP00000389140        | AAC51287.1             |
|                     | Lizard                               | <i>Anolis carolinensis</i>             | ENSACAP00000008535     | XP_003227756.1         |
|                     | Gekko                                | <i>Gekko japonicus</i>                 | XP_015283785.1         | XP_015281163.1         |
|                     | American Alligator                   | <i>Alligator mississippiensis</i>      | XP_014449591.1         | XP_014459957.1         |
|                     | Chinese Alligator                    | <i>Alligator sinensis</i>              | XP_006018932.1         | XP_006026332.1         |
|                     | Painted turtle                       | <i>Chrysemys picta bellii</i>          | XP_005296926.1         | XP_005281067.1         |
|                     | Chinese turtle                       | <i>Pelodiscus sinensis</i>             | XP_006136853.2         | XP_006122251.2         |
|                     | Sea Turtle                           | <i>Chelonia mydas</i>                  | XP_007063909.1         | XP_007059969.1         |
|                     | Ostrich                              | <i>Struthio camelus australis</i>      | XP_009664396.0         | XP_009673998.0         |
|                     | Kiwi                                 | <i>Apteryx australis mantelli</i>      | XP_013800074.1         | XP_013800108.1         |
|                     | Tinamu                               | <i>Tinamus guttatus</i>                | XP_010215865.1         | XP_010223404.1         |
| Paleo.              | Chicken                              | <i>Gallus gallus</i>                   | ND                     | AAC59662.1             |
|                     | Quail                                | <i>Coturnix Japonicus</i>              | ND                     | XP_015727843.1         |
| Galli.              | Turkey                               | <i>Meleagris gallopavo</i>             | ND                     | XP_003209386.1         |
|                     | Duck                                 | <i>Anas platyrhynchos</i> (mallard)    | XP_005011860.1         | XP_005017275.1         |
| Ans.                | Goose                                | <i>Anser cygnoides domesticus</i>      | XP_013050573.1         | XP_013049547.1         |
|                     | Hummingbird                          | <i>Calypte anna</i>                    | ND                     | XP_008500653.1         |
| Striso.             | Swift                                | <i>Chaetura pelagica</i>               | XP_010001093.1         | XP_010004197.1         |
|                     | chuck-will's-widow                   | <i>Caprimulgus carolinensis</i>        | ND                     | XP_010166263.1         |
| Columbaves          | Turaco                               | <i>Tauraco erythrolophus</i>           | XP_009978908.1         | XP_009991006.1         |
|                     | Pigeon                               | <i>Columba livia</i>                   | XP_005503037.1         | XP_005512248.1         |
|                     | Sandgrouse                           | <i>Pterocles gutturalis</i>            | ND                     | XP_010070753.1         |
|                     | Cuckoo                               | <i>Cuculus canorus</i>                 | XP_009561651.1         | XP_009567164.1         |
|                     | Mesite                               | <i>Mesitornis unicolor</i>             | Part. (XP_010181434.1) | Part. XP_010191234.1   |
| Gru.                | Crowned crane                        | <i>Balearica regulorum gibbericeps</i> | XP_010310977.1         | XP_010299714.1         |
|                     | Bustard                              | <i>Chlamydotis macqueenii</i>          | Part. (XP_010126392.1) | XP_010125600.1         |
| Aequoriformithes    | Loon                                 | <i>Gavia stellata</i>                  | XP_009818994.1         | XP_009811795.1         |
|                     | Fulmar                               | <i>Fulmarus glacialis</i>              | XP_009583160.1         | XP_009579568.1         |
|                     | Cormorant                            | <i>Phalacrocorax carbo</i>             | ND                     | XP_009501723.1         |
|                     | Pelican                              | <i>Pelecanus crispus</i>               | XP_009476861.1         | XP_009483113.1         |
|                     | Egret                                | <i>Egretta gazetta</i>                 | XP_009635714.1         | XP_009642196.1         |
|                     | Ibis                                 | <i>Nipponia nippon</i>                 | XP_009461288.1         | XP_009467911.1         |
|                     | Killdeer                             | <i>Charadrius vociferus</i>            | XP_009884696.1         | XP_009893858.1         |
|                     | Ruff                                 | <i>Calidris pugnax</i>                 | XP_014795236.1         | XP_014809326.1         |
|                     | Tropicbird                           | <i>Phaethon lepturus</i>               | ND                     | XP_010290237.1         |
|                     | Sunbittern                           | <i>Eurypyga helias</i>                 | ND                     | XP_010145839.1         |
|                     | Adeli Penguin                        | <i>Pygoscelis adeliae</i>              | XP_009321339.1         | XP_009318182.1         |
|                     | Emperor Penguin                      | <i>Aptenodytes forsteri</i>            | XP_009273020.1         | XP_009277190.1         |
|                     | Golden Eagle                         | <i>Aquila chrysaetos canadensis</i>    | XP_011588980.1         | XP_011588100.1         |
|                     | White-tailed Eagle                   | <i>Haliaeetus albicilla</i>            | XP_009927949.1         | XP_009926840.1         |
|                     | Bald Eagle                           | <i>Haliaeetus leucocephalus</i>        | XP_010581336.1         | XP_010569893.1         |
| Rhinoceros hornbill | <i>Buceros rhinoceros silvestris</i> | XP_010140526.1                         | XP_010144031.1         |                        |
| Coracii.            | Cuckoo roller                        | <i>Leptosomus discolor</i>             | Part. (XP_009950574.1) | XP_009955259.1         |
|                     | Bee-eater                            | <i>Merops nubicus</i>                  | ND                     | XP_008942215.1         |
|                     | Woodpecker                           | <i>Picoides pubescens</i>              | ND                     | XP_009904177.1         |
|                     | Trogon                               | <i>Apaloderma vittatum</i>             | Part. (XP_009875528.1) | Part. (XP_009863463.1) |
| Hoatzin             | <i>Opisthocomus hoazin</i>           | XP_009943494.1                         | XP_009934163.1         |                        |
| Seriema             | <i>Cariama cristata</i>              | ND                                     | XP_009708043.1         |                        |
| Falc.               | Falcon                               | <i>Falco cherrug</i>                   | XP_005438019.1         | XP_005437570.1         |
|                     | Falcon                               | <i>Falco peregrinus</i>                | XP_005242943.1         | XP_005232662.1         |
| Psit.               | Kea                                  | <i>Nestor notabilis</i>                | ND                     | XP_010011546.1         |
|                     | Budgerigar                           | <i>Melopsittacus undulatus</i>         | XP_012983556.1         | XM_005145789.2         |
| Passeriforme        | Ground tit                           | <i>Pseudopodoces humilis</i>           | ND                     | XP_005521773.1         |
|                     | Flycatcher                           | <i>Ficedula albicollis</i>             | ND                     | XP_005051876.1         |
|                     | Zebra Finch                          | <i>Taeniopygia guttata</i>             | ND                     | XP_002190793.1         |
|                     | Ground Finch                         | <i>Geospiza fortis</i>                 | ND                     | XP_005425990.1         |
|                     | Sparrow                              | <i>Zonotrichia albicollis</i>          | ND                     | XP_014124836.1         |
|                     | Hooded crow                          | <i>Corvus cornix</i>                   | ND                     | XP_010410734.1         |
|                     | Canary                               | <i>Serinus canaria</i>                 | ND                     | XP_009088347.1         |
|                     | Manakin                              | <i>Manacus vitellinus</i>              | ND                     | XP_008922371.1         |
|                     | American crow                        | <i>Corvus brachyrhynchos</i>           | ND                     | XP_008629530.1         |
|                     | Starling                             | <i>Sturnus vulgaris</i>                | ND                     | XP_014744736.1         |
|                     | Rifleman                             | <i>Acanthisitta chloris</i>            | ND                     | XP_009075656.1         |
|                     | <b>Name</b>                          | <b>Latin name</b>                      | <b>Frazzled</b>        |                        |
|                     | Fruit fly                            | <i>Drosophila melanogaster</i>         | NP_523716.2            |                        |

|     |                        |
|-----|------------------------|
| Key | NCBI Genome Browser    |
|     | Ensembl Genome Browser |
|     | Partial sequence       |
|     | ND : No Data           |

- Paleo. Paleognathes
- Galli. Galliformes
- Ans. Anseriformes
- Striso. Strisores
- Gru. Gruiformes
- Acci. Accipitriformes
- Coracii. Coraciiformes
- Falc. Falconiformes
- Psit. Psittaciformes

**Table S2 – Names and references of NETRIN proteins identified and used in this study.**

| Name           | Latin name                        | Gene ID                                 |                     |                     |                                         |
|----------------|-----------------------------------|-----------------------------------------|---------------------|---------------------|-----------------------------------------|
|                |                                   | NTN1 (a/b)                              | NTN2/3              | NTN5                | NTN4 (a/b)                              |
| Spotted Gar    | <i>Lepisosteus oculeatus</i>      | ENSLTCP00000016355                      | ENSLTCP00000010931  | ENSLTCP00000017788  | ENSLTCP00000019382                      |
| Zebrafish      | <i>Danio rerio</i>                | ENSDARP00000024821   ENSDARP00000038885 | ENSDARP000000127895 | ENSDARP00000052908  | ENSDARP000000132076                     |
| Tilapia        | <i>Oreochromis niloticus</i>      | ENSONIP00000022872   ENSONIP00000010389 | ENSONIP00000025223  | ENSONIP00000023890  | ENSONIP00000010787   ENSONIP00000022484 |
| Tetraodon      | <i>Tetraodon nigroviridis</i>     | ENSTNIP00000013104   ENSTNIP00000013104 | ENSTNIP00000015771  | ENSTNIP00000013058  | ENSTNIP00000015647   ENSTNIP00000019104 |
| Xenopus        | <i>Xenopus tropicalis</i>         | ENSXETP00000042263                      | ENSXETP00000043788  | ENSXETP00000063547  | XP_002941301.2                          |
| Opossum        | <i>Monodelphis domestica</i>      | ENSMODP00000010543                      | ENSMODP00000019264  | ENSMODP00000040382  | ENSMODP00000010079                      |
| Elephant       | <i>Loxodonta africana</i>         | XP_003416830.1                          | ENSLAFP00000010538  | ENSLAFP00000001628  | ENSLAFP00000003437                      |
| Mouse          | <i>Mus musculus</i>               | ENSMUSP000000104314                     | NP_035077.1         | ENSMUSP000000138412 | ENSMUSP00000020204                      |
| Human          | <i>Homo sapiens</i>               | ENSP000000173229                        | ENSP000000293973    | ENSP000000270235    | ENSP000000340998                        |
| Lizard         | <i>Anolis carolinensis</i>        | XP_008102492.1                          | ENSACAP00000001541  | ENSACAP00000015606  | ENSACAP00000013843                      |
| Painted turtle | <i>Chrysemys picta bellii</i>     | XP_005309923.1                          | ND                  | XP_005312122.1      | XP_005306562.1                          |
| Sea Turtle     | <i>Chelonia mydas</i>             | XP_007072692.1                          | XP_007054595.1      | XP_007067254.1      | XP_007069305.1                          |
| Ostrich        | <i>Struthio camelus australis</i> | XP_009672469.1                          | XP_009670387.1      | ND                  | XP_009672888.1                          |
| Chicken        | <i>Gallus gallus</i>              | ENSGALP000000038541                     | ENSGALP00000043056  | ND                  | ENSGALP00000018590                      |
| Turkey         | <i>Meleagris gallopavo</i>        | XP_010719536.1                          | XP_010718184.1      | ND                  | XP_010707623.1                          |
| Falcon         | <i>Falco peregrinus</i>           | XP_005236273.1                          | XP_005241062.1      | ND                  | XP_005242758.2                          |
| Ibis           | <i>Nipponia nippon</i>            | XP_009461473.1                          | XP_009460387.1      | ND                  | XP_009462272.1                          |
| Pigeon         | <i>Columba livia</i>              | XP_005515376.2                          | XP_005505712.1      | ND                  | XP_013225601.1                          |
| Zebra Finch    | <i>Taeniopygia guttata</i>        | ENSTGUP00000005317                      | ENSTGUP00000003367  | ND                  | ENSTGUP00000008736                      |
| Ground Finch   | <i>Geospiza fortis</i>            | XP_005427923.1                          | XP_005425254.1      | ND                  | XP_014162721.1                          |
| Ground tit     | <i>Pseudopodoces humilis</i>      | XP_005531006.1                          | XP_005522839.1      | ND                  | XP_014104309.1                          |
| <b>Name</b>    | <b>Latin name</b>                 | <b>NTN1</b>                             | <b>NTN4</b>         |                     |                                         |
| Amphioxus      | <i>Branchiostoma floridae</i>     | XP_002606106.1                          | XP_002209834.1      |                     |                                         |

Sauropsid  
Aves  
Galli  
Pass.

Key : NCBI Genome Browser  
Ensembl Genome Browser  
Partial sequence  
ND : No Data

Galli. Galliformes  
Pass. Passeriformes





**Table S4 – Names of the genes used in DCC synteny analysis.**

| Short name     | Full name                                                             |
|----------------|-----------------------------------------------------------------------|
| <b>HDHD2</b>   | haloacid dehalogenase-like hydrolase domain containing 2              |
| <b>IER3IP1</b> | immediate early response 3 interacting protein 1                      |
| <b>SKOR2</b>   | SKI family transcriptional corepressor 2                              |
| <b>SMAD2</b>   | SMAD family member 2                                                  |
| <b>ZBTB7C</b>  | zinc finger and BTB domain containing 7C                              |
| <b>CTIF</b>    | CBP80/20-dependent translation initiation factor                      |
| <b>SMAD7</b>   | SMAD family member 7                                                  |
| <b>DYM</b>     | dymeclin                                                              |
| <b>RPL17</b>   | 60S ribosomal protein L17                                             |
| <b>LIPG</b>    | lipase, endothelial                                                   |
| <b>ACAA2</b>   | acetyl-CoA acyltransferase 2                                          |
| <b>MyoVb</b>   | myosin VB                                                             |
| <b>CFAP53</b>  | cilia and flagella associated protein 53                              |
| <b>SKA1</b>    | spindle and kinetochore associated complex subunit 1                  |
| <b>MAPK4</b>   | mitogen-activated protein kinase 4                                    |
| <b>ME2</b>     | malic enzyme 2, NAD(+)-dependent, mitochondrial                       |
| <b>ELAC1</b>   | elaC ribonuclease Z 1                                                 |
| <b>SMAD4</b>   | SMAD family member 4                                                  |
| <b>MEX3C</b>   | mex-3 RNA binding family member C                                     |
| <b>DCC</b>     | Deleted in Colorectal Carcinoma                                       |
| <b>MBD2</b>    | methyl-CpG binding domain protein 2                                   |
| <b>POLi</b>    | polymerase (DNA directed) iota                                        |
| <b>STARD6</b>  | StAR-related lipid transfer (START) domain containing 6               |
| <b>DYNAP</b>   | dynactin associated protein                                           |
| <b>RAB27B</b>  | RAB27B, member RAS oncogene family                                    |
| <b>CCDC68</b>  | coiled-coil domain containing 68                                      |
| <b>TCF4</b>    | transcription factor 4                                                |
| <b>TXNL1</b>   | thioredoxin-like 1                                                    |
| <b>WDR7</b>    | WD repeat domain 7                                                    |
| <b>ST8SIA3</b> | ST8 alpha-N-acetyl-neuraminide alpha-2,8-sialyltransferase 3          |
| <b>FECH</b>    | ferrochelataase                                                       |
| <b>NARS</b>    | asparaginyl-tRNA synthetase                                           |
| <b>ATP8B1</b>  | ATPase, aminophospholipid transporter, class I, type 8B, member 1     |
| <b>NEDD4L</b>  | neural precursor cell expressed, developmentally downregulated 4-like |
| <b>ALPK2</b>   | alpha-kinase 2                                                        |
| <b>MALT1</b>   | mucosa associated lymphoid tissue lymphoma translocation gene 1       |
| <b>ZNF532</b>  | zinc finger protein 532                                               |
| <b>SEC11C</b>  | SEC11 homologue C ( <i>S. cerevisiae</i> )                            |
| <b>GRP</b>     | gastrin-releasing peptide                                             |
| <b>RAX</b>     | retina and anterior neural fold homeobox                              |
| <b>CPLX4</b>   | complexin 4                                                           |
| <b>LMAN1</b>   | lectin, mannose-binding, 1                                            |

**Table S5 – List of species used in DCC synteny analysis.**

| Species            | Latin name                          |
|--------------------|-------------------------------------|
| Human              | <i>Homo sapiens</i>                 |
| Mouse              | <i>Mus musculus</i>                 |
| Platypus           | <i>Ornithorhynchus anatinus</i>     |
| Painted Turtle     | <i>Chrysemys picta bellii</i>       |
| Alligator S        | <i>Alligator sinensis</i>           |
| Duck               | <i>Anas platyrhynchos</i> (mallard) |
| Goose              | <i>Anser cygnoides domesticus</i>   |
| Chicken            | <i>Gallus gallus</i>                |
| Turkey             | <i>Meleagris gallopavo</i>          |
| Quail              | <i>Coturnix japonica</i>            |
| Saker Falcon       | <i>Falco cherrug</i>                |
| Bald Eagle         | <i>Haliaeetus leucocephalus</i>     |
| Adeli Penguin      | <i>Pygoscelis adeliae</i>           |
| Royal Eagle        | <i>Aquila chrysaetos canadensis</i> |
| Pigeon             | <i>Columba livia</i>                |
| Emperor Penguin    | <i>Aptenodytes forsteri</i>         |
| Ibis               | <i>Nipponia nippon</i>              |
| Cuckoo             | <i>Cuculus canorus</i>              |
| Ostrich            | <i>Struthio camelus australis</i>   |
| Egret              | <i>Egretta garzetta</i>             |
| Hoatzin            | <i>Opisthocomus hoazin</i>          |
| Chimney Swift      | <i>Chaetura pelagica</i>            |
| Tibetan ground Tit | <i>Pseudopodoces humilis</i>        |
| Zebra finch        | <i>Taeniopygia guttata</i>          |
| Sparrow            | <i>Zonotrichia albicollis</i>       |
| Flycatcher         | <i>Ficedula albicollis</i>          |
| Crow               | <i>Corvus brachyrhynchos</i>        |

**Table S6 – Recapitulation of animal samples used in this study: names, stages and staining.**

| <b>Species</b> | <b>Incubation time (days)</b> | <b>Hamburger-Hamilton stage or equivalent</b> | <b>Total number</b> |
|----------------|-------------------------------|-----------------------------------------------|---------------------|
| Chicken        | 4                             | HH21-22                                       | 8                   |
|                | 6                             | HH27-28                                       | 8                   |
|                | 8                             | HH31                                          | 5                   |
|                | 10                            | HH36                                          | 3                   |
| Duck           | 4,5                           | 21                                            | 5                   |
|                | 6                             | 23                                            | 4                   |
|                | 8                             | 27-28                                         | 7                   |
|                | 10                            | 30                                            | 3                   |
| Pigeon         | 4                             | 21                                            | 2                   |
|                | 7                             | 25                                            | 1                   |
|                | 9                             | 30                                            | 3                   |
| Zebra Finch    | 4                             | 22                                            | 6                   |
|                | 7                             | 31                                            | 3                   |
| Quail          | 4                             | 22                                            | 2                   |
| Pheasant       | 4                             | 21                                            | 3                   |
| Partridge      | 4                             | 21                                            | 3                   |

**Movie S1**

Triple whole-mount immunolabeling for DCC (blue),  $\beta$ III-Tubulin (yellow) and Doublecortin (red), followed by 3Disco clearing in embryos from 4 bird species (Duck, Chicken, Pigeon and Zebra finch).

**Movie S2**

ROBO3 whole-mount immunolabeling and 3Disco clearing in a HH22 chick embryo.

**Movie S3**

ROBO3 whole-mount immunolabeling and 3Disco clearing in a 4 day-old pigeon embryo.
